# Supplementary material
Source: Springer Nature journal article supplement (https://www.springermedizin.de/resource/supplementary/12891_2007_523_MOESM2_ESM.pdf/9511230)
Supplement: MOESM2 [file 9511230]

**Table 3** SF-36 questionnaire at baseline, 8weeks, 6months and 12months using repeated measures ANOVA. Values are mean (SE) and Confidence Intervals (CI)  
SF-36 non-normalized scores. Higher scores indicate improvement

|                        | <b>BL</b>       | <b>8wks</b>     | <b>6mths</b>    | <b>12mths</b>   | <b>F-value</b> | <b>p-value</b> | <b>1) Improvement at 12months<br/>2) 95% (CI) of improvement<br/>3) Effect Size BL to 12months</b> |                |          |
|------------------------|-----------------|-----------------|-----------------|-----------------|----------------|----------------|----------------------------------------------------------------------------------------------------|----------------|----------|
| <b>SF36 (0 to 100)</b> |                 |                 |                 |                 |                |                | <b>1</b>                                                                                           | <b>2</b>       | <b>3</b> |
| Physical Function      | 47.62<br>(2.47) | 52<br>(2.58)    | 56.18<br>(2.58) | 55.36<br>(3.1)  | 3, 201         | <0.001         | 7.73                                                                                               | (2.7 to 12.7)  | 0.3      |
| Role Physical          | 29.77<br>(4.54) | 41.54<br>(4.87) | 43.01<br>(4.99) | 46.69<br>(5.23) | 3, 201         | 0.004          | 16.91                                                                                              | (7.2 to 26.5)  | 0.4      |
| Bodily pain            | 35.5<br>(1.85)  | 40.39<br>(2.06) | 41.52<br>(2.52) | 43.67<br>(2.49) | 3, 201         | 0.017          | 8.147                                                                                              | (3.03 to 13.2) | 0.5      |
| General Health         | 63.72<br>(2.58) | 67.05<br>(2.25) | 69.13<br>(2.57) | 69.79<br>(2.5)  | 3, 201         | 0.018          | 6.07                                                                                               | (1.5 to 10.5)  | 0.3      |
| Vitality               | 50.41<br>(2.74) | 56.38<br>(2.1)  | 57.3<br>(2.41)  | 60.7<br>(2.58)  | 3, 201         | <0.001         | 10.3                                                                                               | (5.2 to 15.3)  | 0.4      |
| Social Function        | 69.64<br>(3.04) | 78.67<br>(2.46) | 76.72<br>(2.81) | 79.98<br>(2.72) | 3, 201         | 0.002          | 10.3                                                                                               | (4.8 to 15.7)  | 0.4      |
| Role Emotional         | 53.97<br>(5.31) | 66.14<br>(4.81) | 71.05<br>(4.98) | 73.01<br>(4.8)  | 3, 201         | 0.002          | 19.04                                                                                              | (9.1 to 28.9)  | 0.4      |
| Mental Health          | 71.02<br>(2.25) | 77.11<br>(1.7)  | 79 (1.9)        | 78.73<br>(2.11) | 3, 201         | <0.001         | 7.7                                                                                                | (3.6 to 11.7)  | 0.4      |
